# Supplementary material for: Molecular characterization of human ABHD2 as TAG lipase and ester hydrolase
Source: Oxford University Press journal article supplement (doi:10.1042/bsr20160033), 2016-06-01
Supplement: bsr036e358add.pdf [file bsr036e358add.pdf]

**Suppl. Fig. 1.**

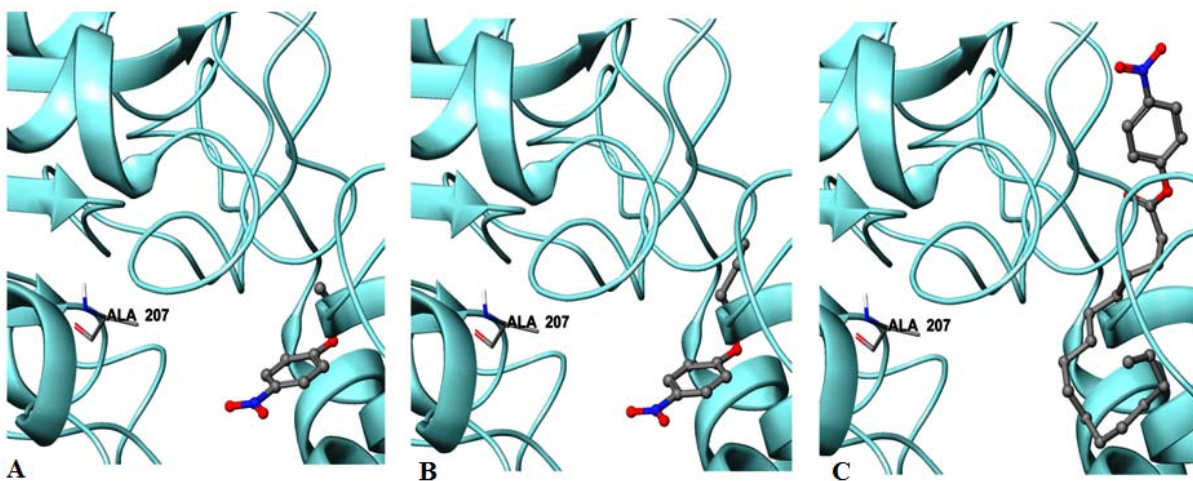

**Suppl. Fig. 1. Docking poses of mutated ABHD2 model:** Ser<sup>207</sup> of conserved GX SXG motif of lipase active site was replaced with alanine. The ligands **A)** pNPA; **B)** pNPB and **C)** pNPP were docked with the mutated ABHD2. There were no interactions observed with any of the substrates docked.
